# Supplementary material
Source: ML conference proceedings conference paper supplement (https://openaccess.thecvf.com/content/ICCV2025/html/Slyman_Calibrating_MLLM-as-a-judge_via_ICCV_2025_paper.html)
Supplement: Supplementary file 1 [file Slyman_Calibrating_MLLM-as-a-judge_via_ICCV_2025_supplemental.pdf]

# Calibrating MLLM-as-a-judge via Multimodal Bayesian Prompt Ensembles

## Supplementary Material

### A. Additional Experimental Details

|              | Factor   | Levels/Value      | Notes                                 |
|--------------|----------|-------------------|---------------------------------------|
| Exps.        | prompts  | 5, 10, 20         | Num. prompts in $\alpha$              |
|              | samples  | 5, 10, 20, 50     | Num. samples in $\mathcal{D}_{val}$   |
|              | clusters | 4, 8, 16, 32, 64  | Num. clusters $K$                     |
| Seeds        | train    | 3 Unique          | Seed for training                     |
|              | data     | 50 Unique         | Seed for sampling $\mathcal{D}_{val}$ |
|              | cluster  | 5 Unique          | Seed for sampling $\mathcal{D}_{sup}$ |
| Clustering   | method   | Spherical         | KMeans version                        |
|              | samples  | $256 \times K$    | Num. clustering samples               |
|              | init     | 3                 | Num. random inits                     |
|              | niter    | 1,000             | Num. training iterations              |
| Optimization | Optim    | L-BFGS            | Optimizer                             |
|              | lr       | 0.01              | Learning rate                         |
|              | history  | 50                | History size                          |
|              | max iter | 100               | Max iterations                        |
|              | search   | strong wolfe      | Search func                           |
| $\phi_I$     | Model    | CLIP-ViT-B16      | [52]                                  |
|              | Weights  | laion2b_s34b_b88k |                                       |

Table 5. Summary of experimental configurations..

See table Tab. 5 for details on experimental factors, clustering configuration, and other hyperparameters.

### B. Generating Instruction Prompts

We employ a variety of methods to construct our prompt set  $\alpha$ . We both manually, and with the aid of GPT, construct lists of personas, prompt templates, and task instruction criteria. We also take these original templates and create “*augmented*” versions by flipping the order of inputs in the template and changing the response glyph (e.g. “A”) vs. “I.”). We provide a sample prompt for reference —

You are a technical expert at

- evaluating 'text-to-image'
- alignment and aesthetics. Your task
- is to assess the quality of two
- images generated from the same
- prompt. The criteria for evaluation
- are as follows:

Image Quality – The image should have a

- well-balanced composition with
- clear framing and focal point,
- effective brightness and contrast
- in lighting, appealing color
- harmony and saturation, sharp focus
- with visible fine details and
- minimal digital noise, and be high
- resolution without pixelation.

Image Artifacts – The image should not

- have any obvious artifacts
- including excessive blur,
- occlusion, warping, or other
- issues.

Be objective in your evaluation, do not

- consider attributes like age, race,
- gender, or other demographic
- information. Respond with a single
- letter only.

[IMAGE 1]

[IMAGE 2]

Caption: [INPUT PROMPT]

Which of the two images do you prefer?

A) I prefer the first image.

B) I prefer the second image.

### C. Derivation of Multimodal Mixture-of-Bayesian Prompt Ensembles

$$\begin{aligned}
\log p(y|x) &= \log \sum_z \sum_a p(y, a, z|x) \\
&= \log \sum_z \sum_a p(y|x, a) p(a|z) p(z|x) \\
&= \log \sum_z \sum_a p(y|x, a) p(a|z) p(z|x) * \frac{q(a|z)}{q(a|z)} \\
&= \log E_{a \sim q(a|z), z \sim p(z|x)} \left[ p(y|x, a) \frac{p(a|z)}{q(a|z)} \right] \\
&\geq E_{a \sim q(a|z), z \sim p(z|x)} \left[ \log p(y|x, a) + \log \frac{p(a|z)}{q(a|z)} \right] \\
&= E_{a \sim q(a|z), z \sim p(z|x)} [\log p(y|x, a)] - E_{a \sim q(a|z), z \sim p(z|x)} \left[ \log \frac{q(a|z)}{p(a|z)} \right] \\
&= \left[ \sum_z p(z|x) \sum_a q(a|z) \log p(y|x, a) \right] - \left[ \sum_z p(z|x) KL(q(a|z) || p(a|z)) \right] \\
&= \sum_z p(z|x) \left[ \left[ \sum_a q(a|z) \log p(y|x, a) \right] - KL(q(a|z) || p(a|z)) \right]
\end{aligned}$$

Assuming uniform priors for  $p(a|z)$  and parameterizing  $q(a|z) = w_{za}$ , we can write the training objective for **Multimodal Mixture-of-Bayesian Prompt Ensembles** to maximize this lower-bound on the log-likelihood of all  $M$  datapoints in  $\mathcal{D}_{val}$  as:

$$\arg \max_{\mathbf{w}} \sum_{j=1}^M \sum_z p(z|x_j) \left[ \sum_a w_{za} \log p(y_j^*|x_j, a) - \sum_a w_{za} \log w_{za} \right] \quad (11)$$

## D. Additional Experiment Configurations

| prompts | samples | Expected Calibration Error ( $\downarrow$ ) |             |             |             |             | Max Calibration Error ( $\downarrow$ ) |             |             |             |             | AUC Precision-Recall ( $\uparrow$ ) |      |      |      |             |
|---------|---------|---------------------------------------------|-------------|-------------|-------------|-------------|----------------------------------------|-------------|-------------|-------------|-------------|-------------------------------------|------|------|------|-------------|
|         |         | 4                                           | 8           | 16          | 32          | 64          | 4                                      | 8           | 16          | 32          | 64          | 4                                   | 8    | 16   | 32   | 64          |
| 5       | 5       | <b>.113</b>                                 | <b>.113</b> | <b>.113</b> | <b>.113</b> | <b>.113</b> | <b>.245</b>                            | <b>.244</b> | <b>.245</b> | <b>.245</b> | <b>.246</b> | .834                                | .835 | .835 | .835 | <b>.836</b> |
|         | 10      | <b>.107</b>                                 | .107        | .108        | .108        | <b>.108</b> | <b>.239</b>                            | <b>.239</b> | <b>.239</b> | <b>.239</b> | <b>.239</b> | .837                                | .837 | .838 | .838 | <b>.838</b> |
|         | 20      | <b>.108</b>                                 | .108        | .108        | .108        | <b>.109</b> | <b>.241</b>                            | <b>.240</b> | <b>.241</b> | .241        | <b>.242</b> | .837                                | .837 | .838 | .838 | <b>.838</b> |
|         | 50      | <b>.107</b>                                 | <b>.107</b> | .107        | .107        | <b>.107</b> | <b>.235</b>                            | <b>.235</b> | .236        | .236        | <b>.237</b> | .839                                | .839 | .839 | .839 | <b>.839</b> |
| 10      | 5       | <b>.092</b>                                 | .092        | .093        | .092        | <b>.093</b> | <b>.199</b>                            | <b>.200</b> | .201        | .201        | <b>.202</b> | .842                                | .842 | .843 | .844 | <b>.844</b> |
|         | 10      | <b>.094</b>                                 | <b>.094</b> | .095        | .095        | <b>.095</b> | <b>.194</b>                            | <b>.195</b> | .196        | .196        | <b>.197</b> | .843                                | .843 | .844 | .844 | <b>.845</b> |
|         | 20      | <b>.090</b>                                 | <b>.090</b> | .091        | .091        | <b>.091</b> | <b>.188</b>                            | <b>.188</b> | .189        | .189        | <b>.189</b> | .844                                | .844 | .845 | .845 | <b>.845</b> |
|         | 50      | <b>.088</b>                                 | <b>.088</b> | .088        | .088        | <b>.089</b> | <b>.187</b>                            | <b>.187</b> | .188        | .188        | <b>.188</b> | .845                                | .845 | .845 | .845 | <b>.845</b> |
| 20      | 5       | <b>.078</b>                                 | .079        | .080        | .080        | <b>.080</b> | <b>.170</b>                            | .172        | .172        | .172        | <b>.173</b> | .845                                | .846 | .847 | .847 | <b>.848</b> |
|         | 10      | <b>.081</b>                                 | <b>.081</b> | .082        | .082        | <b>.082</b> | <b>.168</b>                            | <b>.169</b> | <b>.169</b> | <b>.169</b> | <b>.169</b> | .846                                | .847 | .847 | .848 | <b>.848</b> |
|         | 20      | <b>.080</b>                                 | <b>.080</b> | .080        | .080        | <b>.081</b> | <b>.159</b>                            | <b>.159</b> | <b>.159</b> | <b>.160</b> | <b>.161</b> | .847                                | .847 | .848 | .848 | <b>.848</b> |
|         | 50      | <b>.076</b>                                 | .076        | .076        | .076        | <b>.077</b> | <b>.153</b>                            | <b>.153</b> | <b>.153</b> | <b>.154</b> | <b>.154</b> | .848                                | .848 | .849 | .849 | <b>.849</b> |

Table 6. Expected calibration error. Lower is better. Multiple cluster sizes. FDR controlled with Benjamini-Yekutieli [5]. HPSv2.

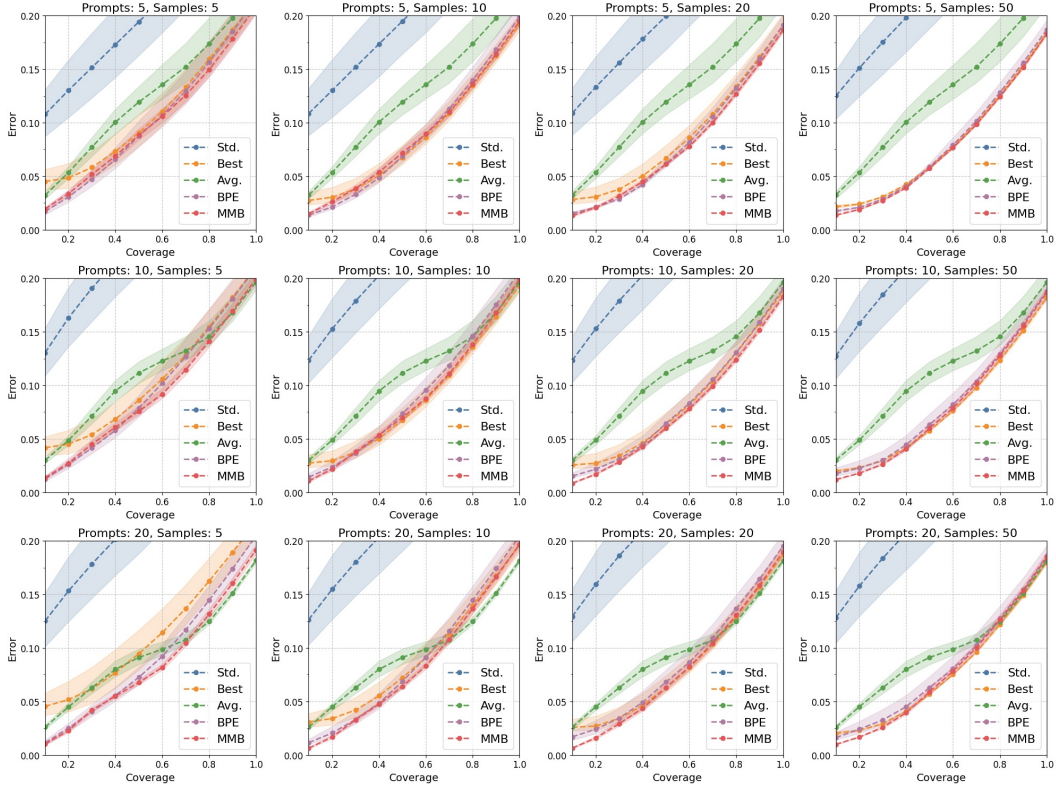

Figure 5. Error-coverage curves for different models. HPSv2.

## E. Additional Qualitative Examples

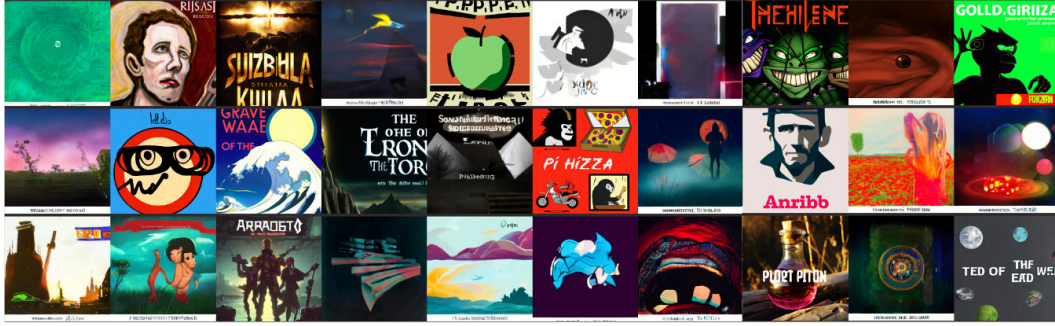

(a) A non-cohesive cluster that results in near-average weights across prompts due to low-validation sample match.

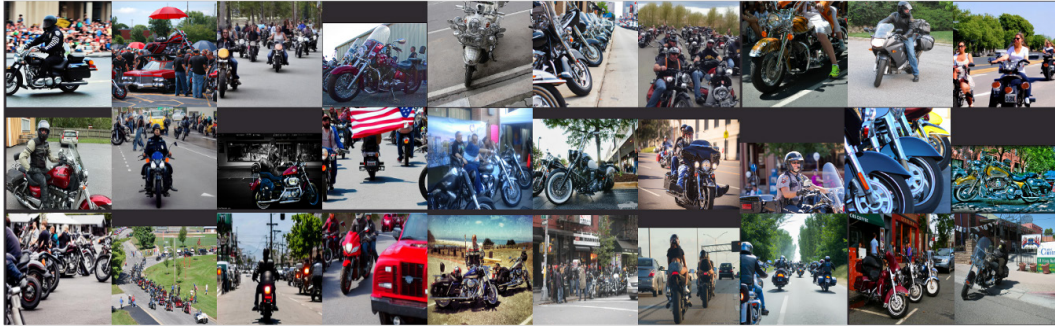

(b) A cohesive cluster which can be matched with validation samples, but does not have any highly weighted prompts.

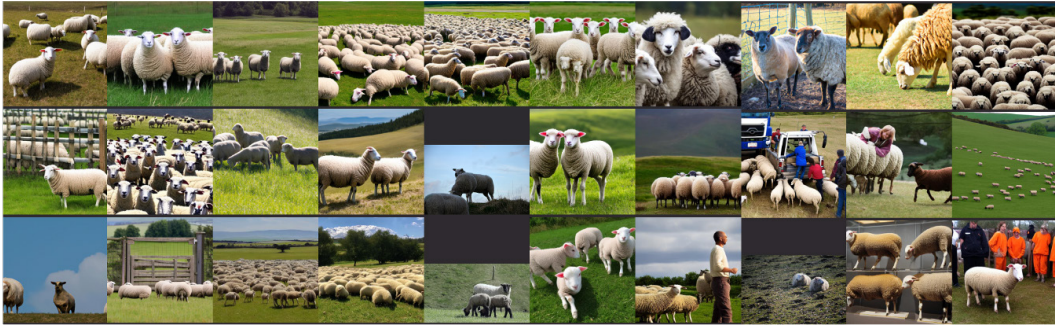

(c) “You are a **photographer** skilled in assessing lighting, focus, and overall image sharpness [...]”

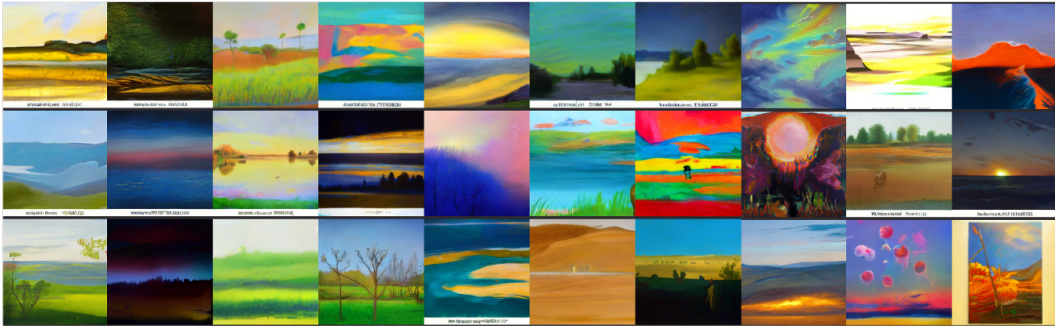

(d) “You are a **landscape artist** skilled in assessing lighting, color, and composition [...]”

Figure 6. Image clusters and their corresponding highest weighted prompts (or lack thereof) when using  $K=64$ ,  $N=200$ .

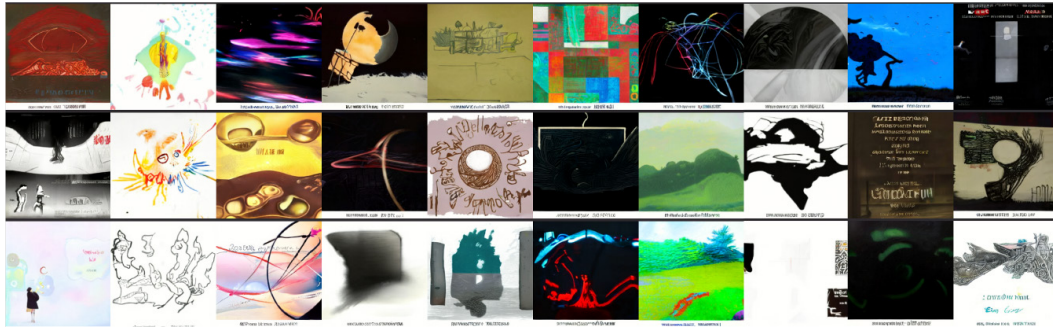

(a) A non-cohesive cluster that results in near-average weights across prompts due to low-validation sample match.

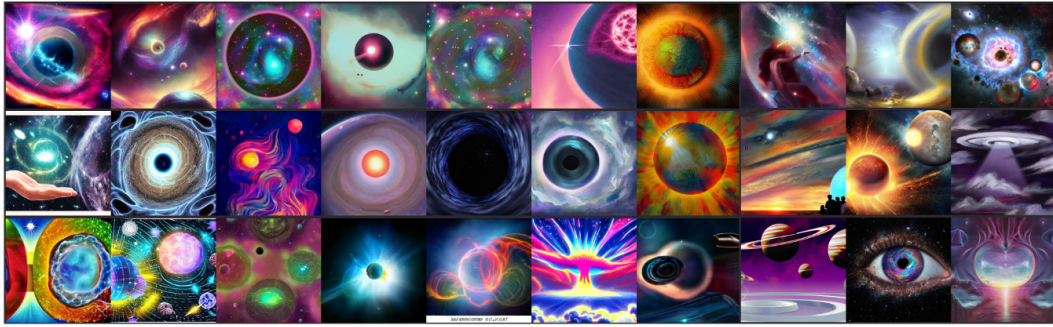

(b) “You are a **graphic designer** with experience in visual clarity and technical image quality [...]”

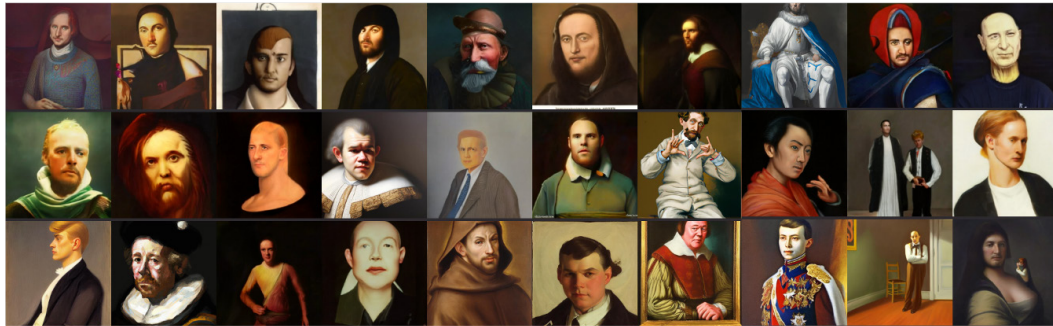

(c) “You are an **art historian** with a keen eye for visual composition and color balance [...]”

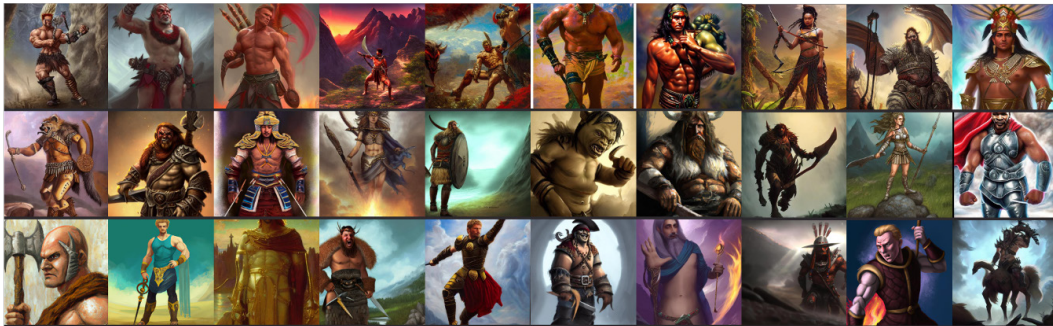

(d) “You are an **AI ethics specialist** focusing on ensuring accurate and unbiased image representations [...]”

Figure 7. Image clusters and their corresponding highest weighted prompts (or lack thereof) when using  $K=64$ ,  $N=200$ .

## F. MJBench Synthetic Preference Examples

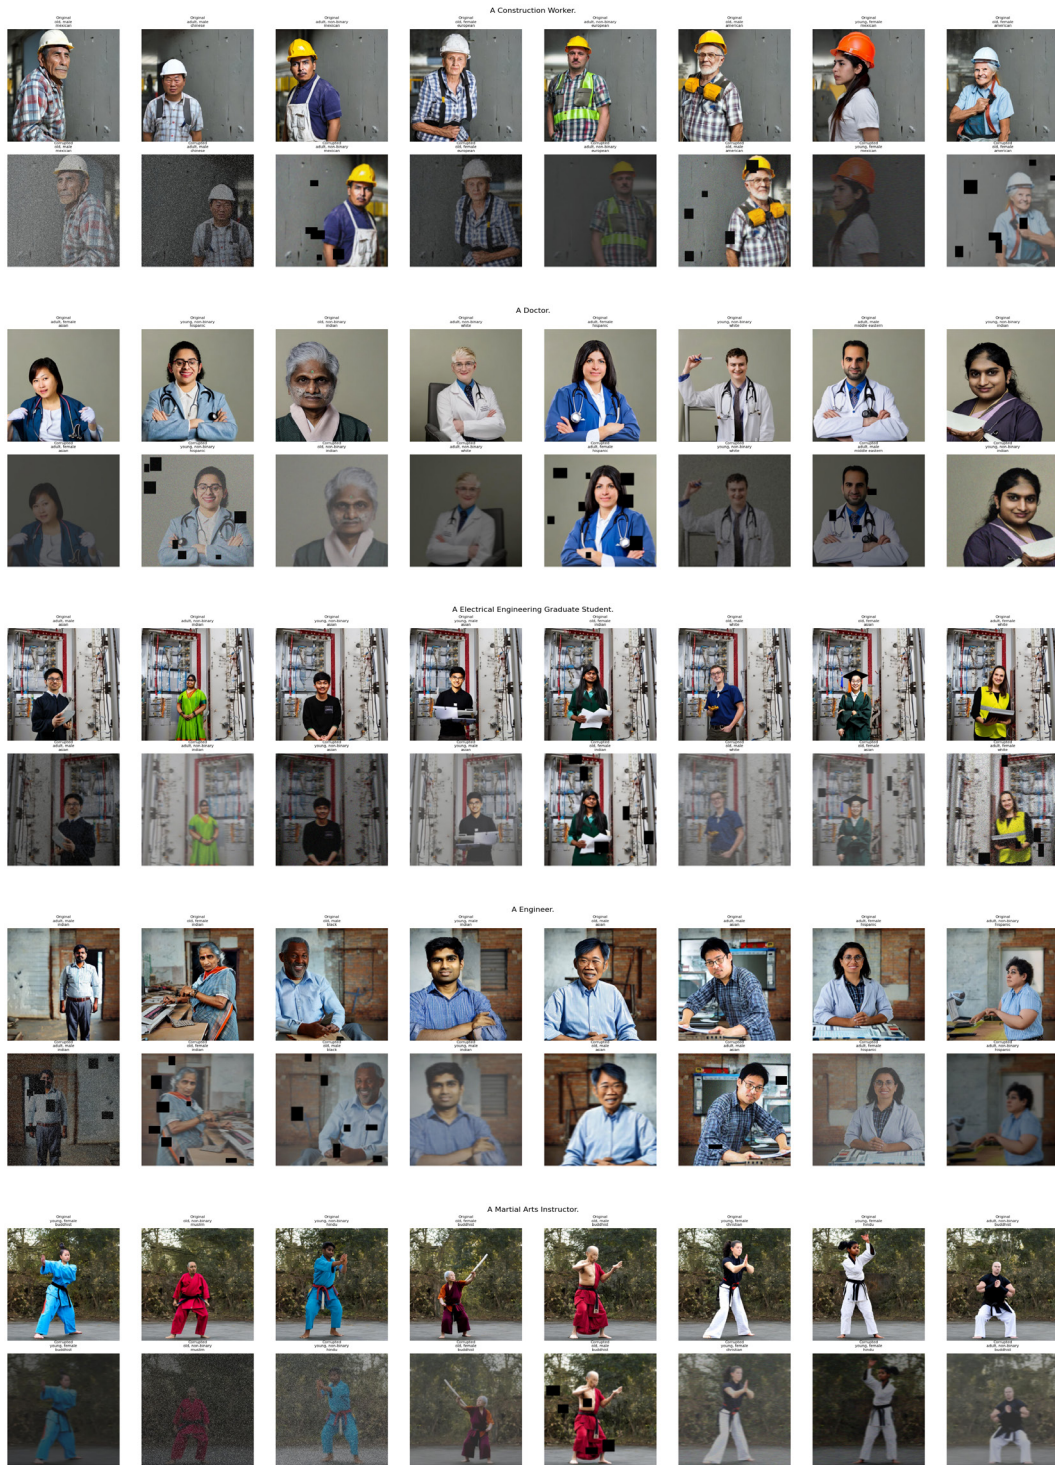

Figure 8. Synthetic images preference pairs generated from MJBench-Bias.
